# Supplementary material for: 3.3 nm-sized TiO2/carbon hybrid spheres endowed with pseudocapacitance-dominated superhigh-rate Li-ion and Na-ion storage
Source: Royal Society of Chemistry journal article supplement (doi:10.1039/c9nr10750a), 2020-01-01
Supplement: c9nr10750a1.pdf [file c9nr10750a1.pdf]

## Supplementary material

### **3.3 nm-sized TiO<sub>2</sub>/carbon hybrid spheres endowed with pseudocapacitance-dominated superhigh-rate Li-ion and Na-ion storages**

Hao Luo, Yuxi Chen,\* Jing Huang, Zhanglong Chen, Xiaohong Xia, Jin Li, Hongbo Liu

College of Material Science and Engineering, Hunan Province Key Laboratory for Advanced Carbon Materials and Applied Technology, Hunan University, Changsha, 410082, China

\*Corresponding author. College of Material Science and Engineering, Hunan Province Key Laboratory for Advanced Carbon Materials and Applied Technology, Hunan University, Changsha 410082, China.

Email: [yxchen@hnu.edu.cn](mailto:yxchen@hnu.edu.cn) (Y. Chen); Tel: +86-731-88664018

## Supporting Notes

**1. Calculation of electrical conductivity:** 10 measurements of the electrical resistivity  $\rho$  ( $\Omega$  cm) of 3.3-TO/C have been conducted, and the values are depicted in the following table. The electrical conductivity  $\sigma$  ( $S$  cm<sup>-1</sup>) is calculated based on the following equation,

$$\sigma = 1/\rho.$$

The reported  $\sigma$  is an average of 8 values except the largest and the lowest ones. The standard division is given.

| 1 <sup>st</sup> | 2 <sup>nd</sup> | 3 <sup>rd</sup> | 4 <sup>th</sup> | 5 <sup>th</sup> | 6 <sup>th</sup> | 7 <sup>th</sup> | 8 <sup>th</sup> | 9 <sup>th</sup> | 10 <sup>th</sup> |
|-----------------|-----------------|-----------------|-----------------|-----------------|-----------------|-----------------|-----------------|-----------------|------------------|
| 72.01           | 85.98           | 75.05           | 79.26           | 69.25           | 78.22           | 71.67           | 73.51           | 70.06           | 78.52            |

## 2. Determination of intersection potential of the domain I and the domain II:

The mathematically smoothed  $C_d$  data in a potential range of 0.01 to 0.12 V (vs Li/Li<sup>+</sup>) have been linearly fitted as fitting line 1 (Figure a in the following image), *i.e.*,

$$y1 = 2016.3 - 7600.5x. \quad (1)$$

The coefficient of determination  $R^2$  is 0.99. Fitting line 2 is derived from the smoothed  $C_d$  data in a potential range of 0.41 to 0.50 V (Figure b), *i.e.*,

$$y2 = 824.5 - 383.1x. \quad (2)$$

The coefficient of determination  $R^2$  is 0.98. The intersection potential thus can be determined by the solution of Equations (1) and (2), *i.e.*,

$$x = 0.17 \text{ V}.$$

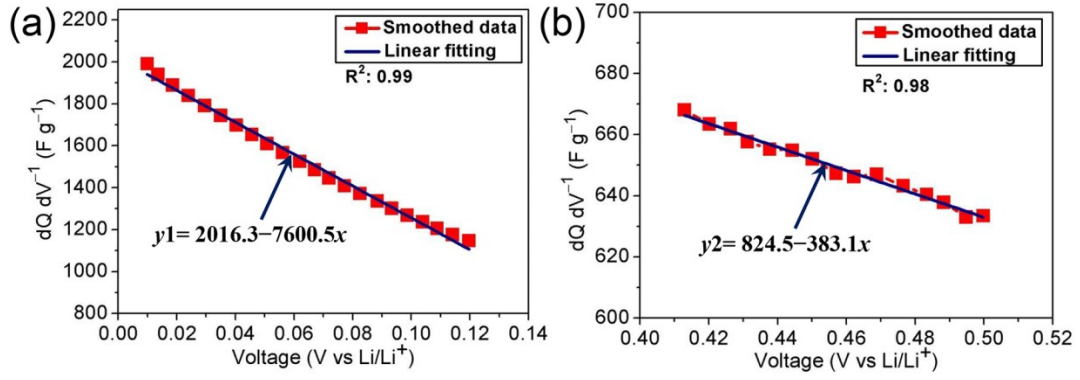

**3. Calculation of average voltage  $V_a$ :** The calculation is based on the voltage profiles of 3.3-TO/C at 2 C (Figure 4e). The energy  $E$  is a product of electric charge  $Q$  and voltage  $V$ , *i.e.*,

$$E = QV. \quad (3)$$

Thus for a given voltage profile,  $E$  is an integration of  $V$  in a full scale of  $Q$ , *i.e.*,

$$E = \int_0^Q V dQ = \int_0^C 3.6V dC. \quad (4)$$

The average voltage  $V_a$  is defined as

$$V_a = \frac{E}{Q} = \frac{\int_0^C 3.6V dC}{3.6C} = \frac{\int_0^C V dC}{C}. \quad (5)$$

## Supporting Figures

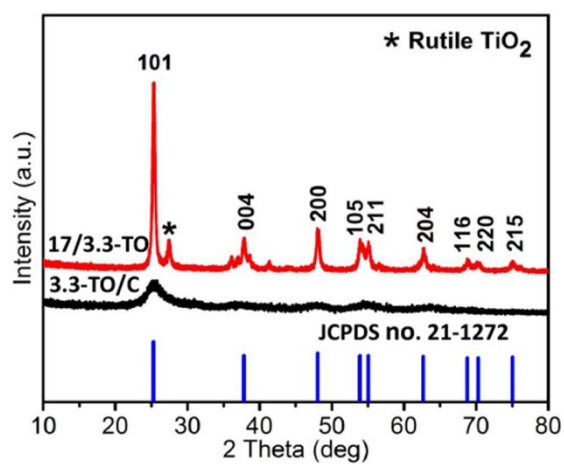

**Fig. S1.** XRD patterns of 3.3-TO/C and 17/5.3-TO.

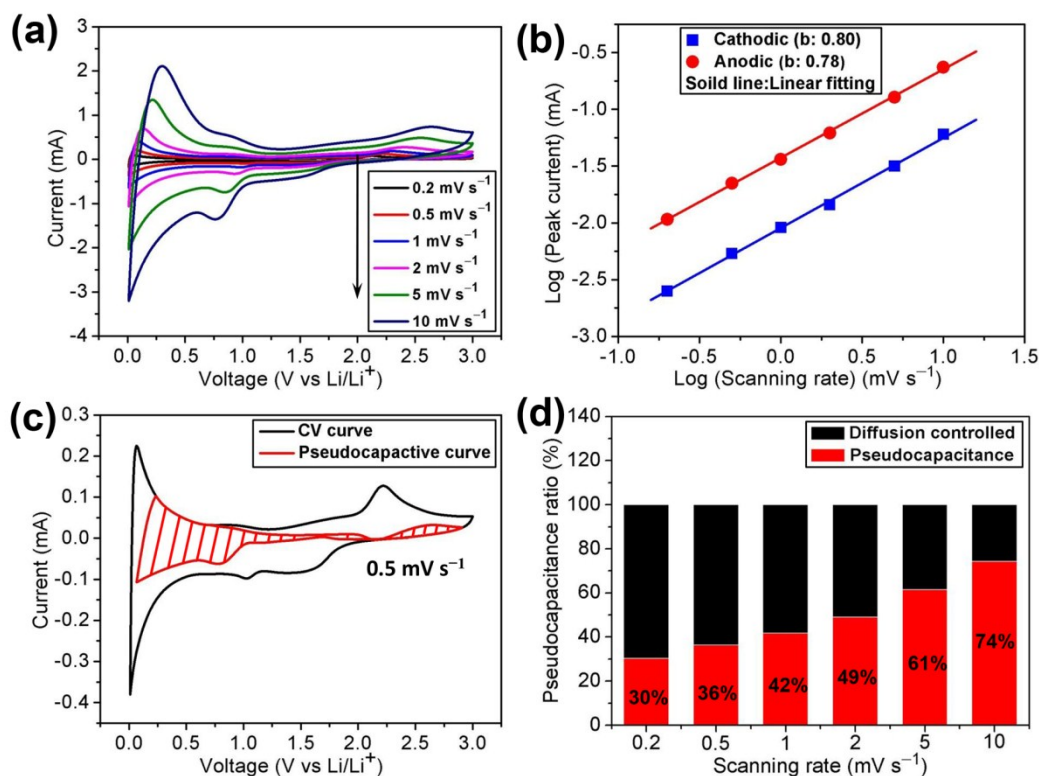

**Fig. S2.** Pseudocapacitive performance of 17/5.3-TO for Li-ion storage. (a) CV curves at various scanning rates. (b) Plots and linear fittings of logarithmic peak current as a function of logarithmic scanning rate of the anodic and the cathodic CV peaks. (c) CV profile and pseudocapacitance contribution represented by the red slashed area at 0.5  $\text{mV s}^{-1}$ . (d) Variation of the pseudocapacitance contribution with an increase of the CV scanning rate.

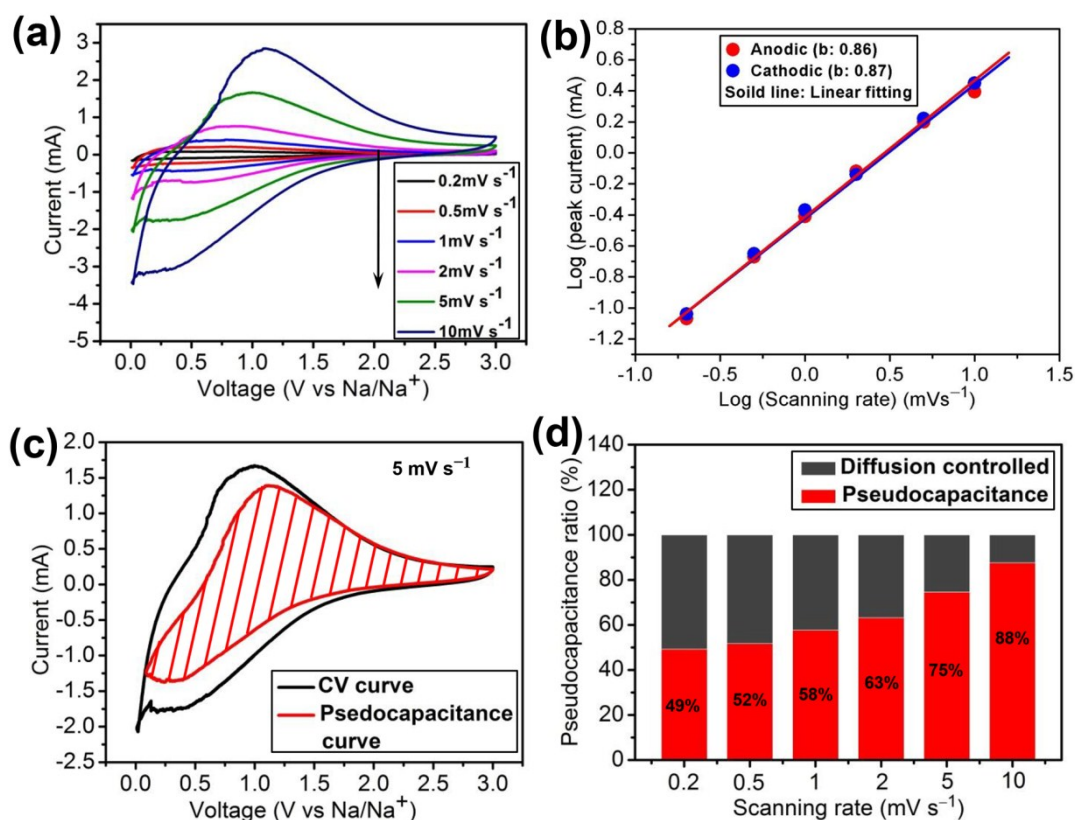

**Fig. S3.** Pseudocapacitive performance of 3.3-TO/C for Na-ion storage. (a) CV curves at various scanning rates. (b) Plots and linear fittings of logarithmic peak current as a function of logarithmic scanning rate of the anodic and the cathodic CV peaks. (c) CV profile and pseudocapacitance contribution represented by the red slashed area at 5  $\text{mV s}^{-1}$ . (d) Variation of the pseudocapacitance contribution with an increase of the CV scanning rate.

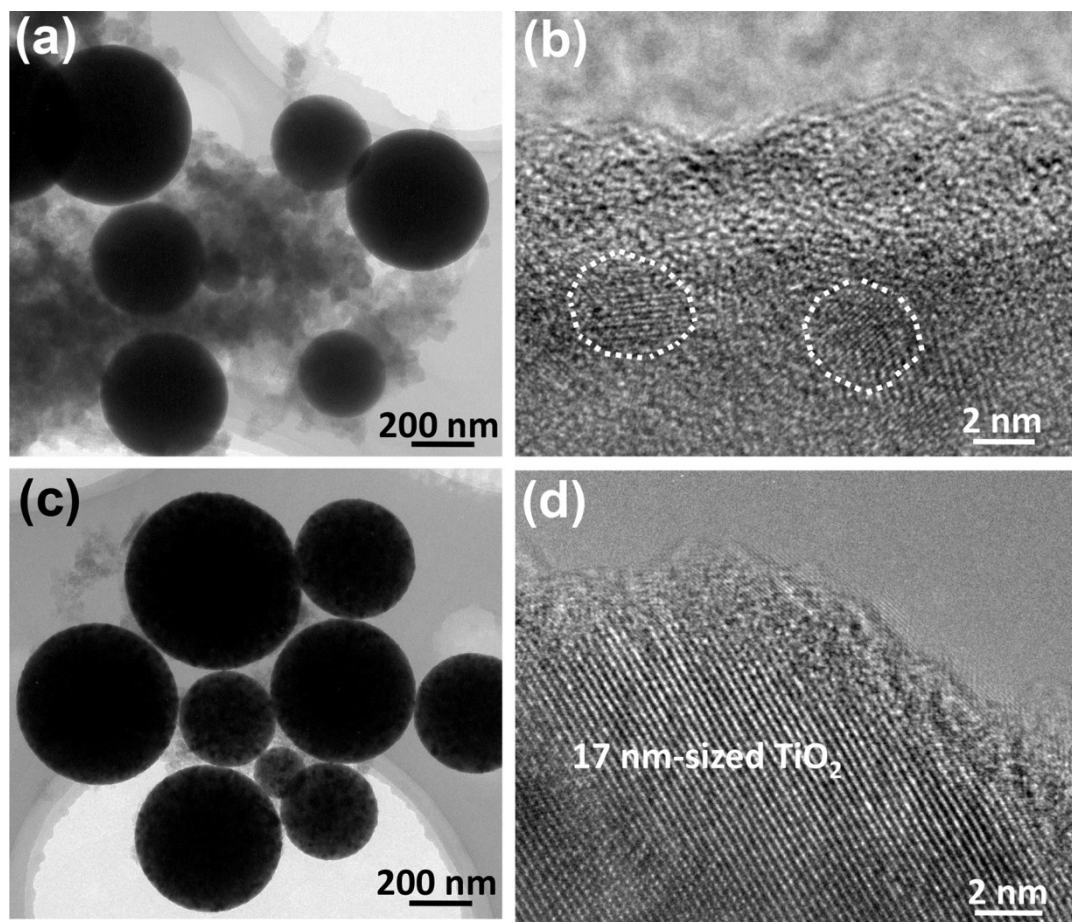

**Fig. S4.** Microstructures of 3.3-TO/C and 17/5.3-TO after 600 discharge/charge cycles of Li-ion storage. (a) TEM and (b) HREM of 3.3-TO/C. (c) TEM and (d) HREM images of 17/5.3-TO.

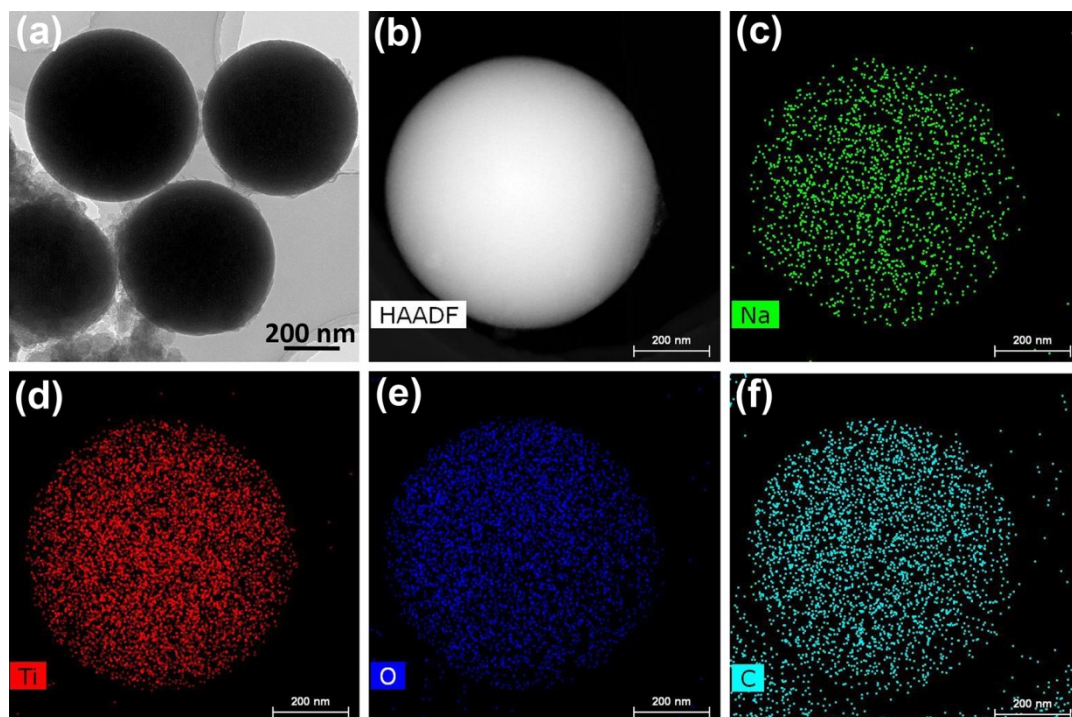

**Fig. S5.** Microstructure and element distributions of 3.3-TO/C after 500 discharge/charge cycles for Na-ion storage. (a) TEM and (b) HAADF image of 3.3-TO/C. Element mappings of (c) sodium, (d) titanium, (e) oxygen and (f) carbon.
